# Supplementary material
Source: PubMed Central journal article supplement (PMC2996428)
Supplement: 1011409107_pnas.201011409SI.pdf [file 1011409107_pnas.201011409SI.pdf]

# Supporting Information

Doles et al. 10.1073/pnas.1011409107

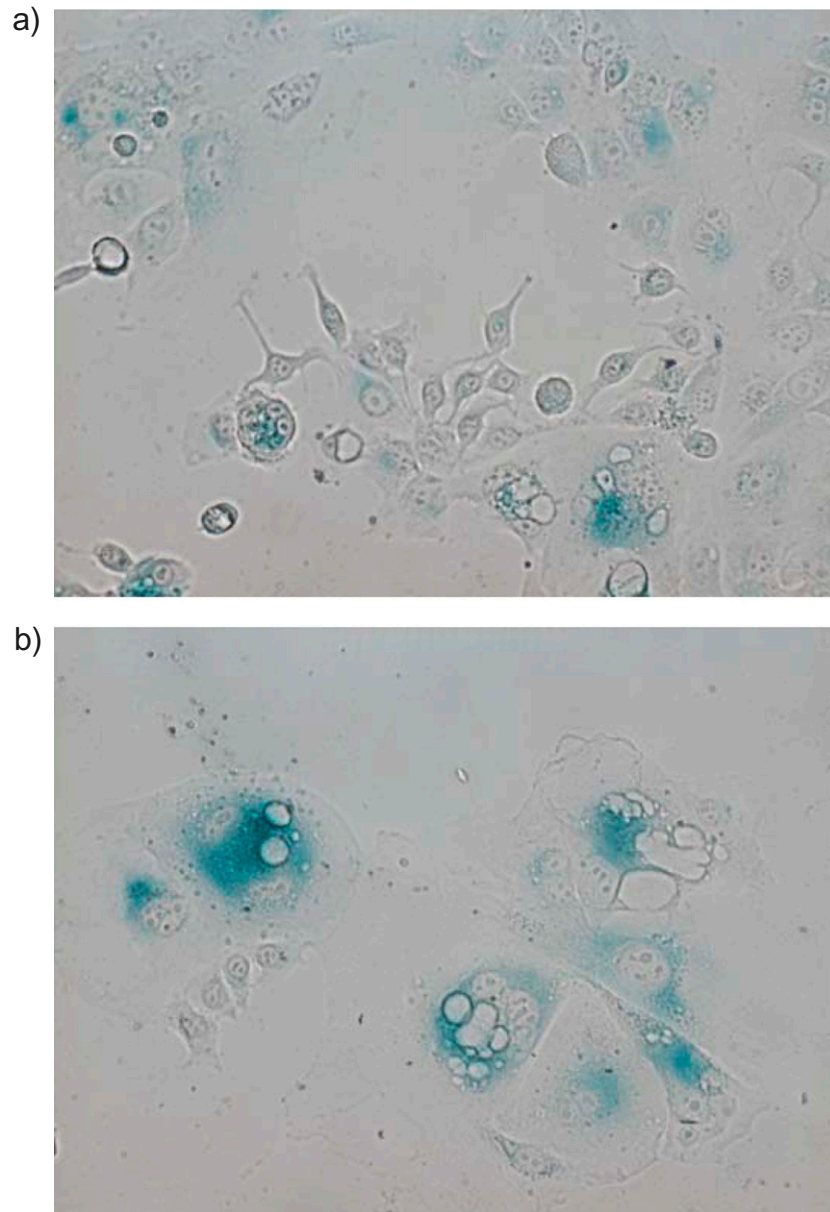

**Fig. 51.**  $\beta$ -Galactosidase staining of (A) control and (B) Rev3 knockdown cells 7 d after treatment with 2.5  $\mu$ M cisplatin. (Magnification: 40 $\times$ .)
